# Supplementary material for: Luminescent coordination polymers for the VIS and NIR range constituting LnCl3 and 1,2-bis(4-pyridyl)ethane
Source: Royal Society of Chemistry journal article supplement (doi:10.1039/c6dt00152a), 2016-01-01
Supplement: c6dt00152a1.pdf [file c6dt00152a1.pdf]

## Supplementary Information

### Luminescent Coordination Polymers for the VIS and NIR Range Constituting from $\text{LnCl}_3$ and 1,2-bis(4-pyridyl)-ethane

N. Dannenbauer,<sup>a</sup> P. R. Matthes<sup>a</sup> and K. Müller-Buschbaum<sup>a</sup>

<sup>a</sup> Institut für Anorganische Chemie, Julius-Maximilians-Universität, Am Hubland, 97074 Würzburg, Germany, E-mail: [k.mueller-buschaum@uni-wuerzburg.de](mailto:k.mueller-buschaum@uni-wuerzburg.de); Fax: (+)49-931-3184785; Tel: (+)49-931-3188724

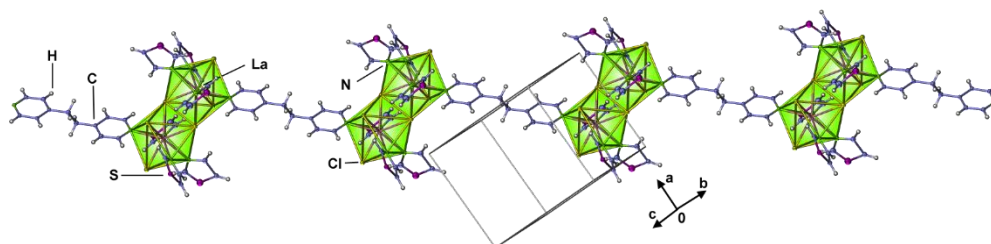

Figure S1. Depiction of the one-dimensional strand of  $\frac{1}{2}[\text{La}_2\text{Cl}_6(\text{bpe})_2(\text{thz})_6]$  (**1**) showing bpe linkage of  $\text{La}_2\text{Cl}_6$  dimers. Thermal ellipsoids depict 50 % of the probability level of the atoms.

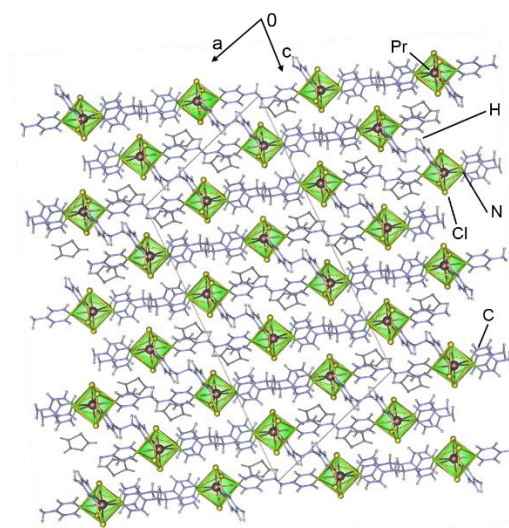

Figure S2. View along the b-axis of the crystal structure of  $\frac{2}{3}[\text{PrCl}_3(\text{bpe})_2] \cdot \text{thz}$  (**3**). Intercalated thiazole molecules are illustrated in grey.

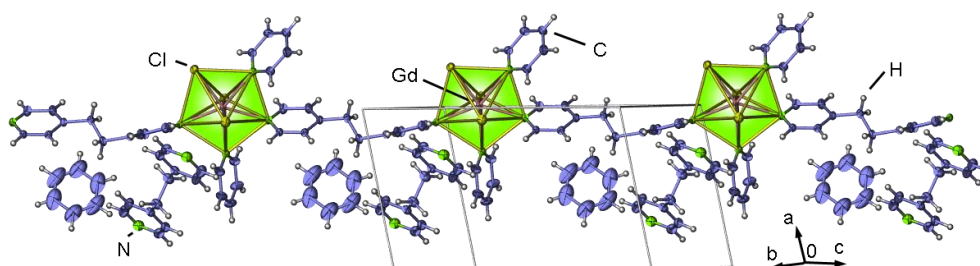

Figure S3. Depiction of the one-dimensional strand of  $\frac{1}{2}[\text{GdCl}_3(\text{bpe})(\text{py})_2] \cdot (\text{bpe}/\text{py})$  (**13**). Thermal ellipsoids depict 50 % of the probability level of the atoms. The intercalated pyridine molecule is described with a benzene molecule, due to rotational disorder effects.

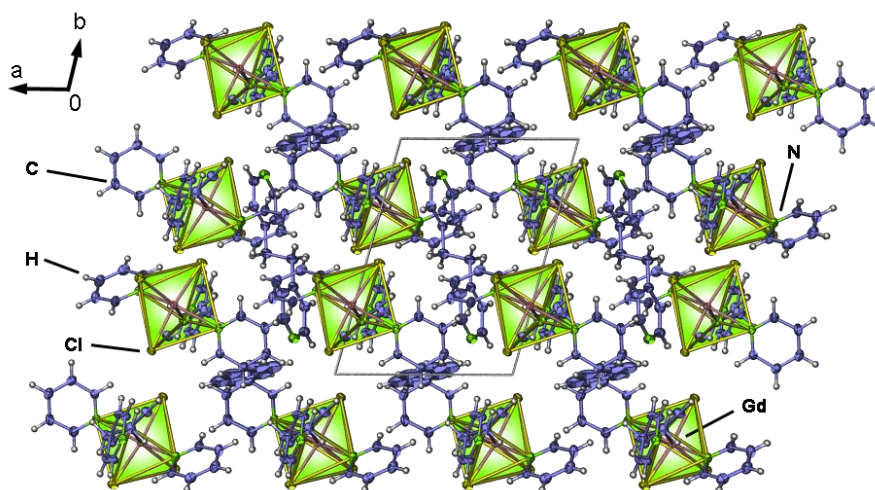

Figure S4. Depiction of the crystal structure of  $\frac{1}{2}[\text{GdCl}_3(\text{bpe})(\text{py})_2] \cdot (\text{bpe}/\text{py})$  (**13**) along *c*-axis. Thermal ellipsoids depict 50 % of the probability level of the atoms. The intercalated pyridine molecule is described with a benzene molecule, due to rotational disorder effects.

Table S1 : Selected interatomic distances and angles for **1**, **2**, **8**, **11** and **13-14**.

|                          | <b>La (1)</b>         | <b>Ce (2)</b>         | <b>Pr (3)</b>         | <b>Dy (8)</b>          | <b>Yb (11)</b>         | <b>Gd (13)</b>        | <b>Er (14)</b>        |
|--------------------------|-----------------------|-----------------------|-----------------------|------------------------|------------------------|-----------------------|-----------------------|
| Ln(1)-Cl(1)              | 2.8212(11)            | 2.7444(7)             | 2.7206(7)             | 2.6332(9)              | 2.5928(12)             | 2.6330(12)            | 2.5822(7)             |
| Ln(1)-Cl(2)              | 2.8685(9)             | 2.7415(7)             | 2.7142(7)             | 2.6005(11)             | 2.6002(13)             | 2.6477(12)            | 2.5981(7)             |
| Ln(1)-Cl(3)              | 2.8221(10)            | 2.7373(7)             | 2.7127(7)             | 2.6309(11)             | 2.5609(13)             | 2.6864(13)            | 2.6460(7)             |
| Ln(1)-Cl(2)'             | 2.9263(11)            |                       |                       |                        |                        |                       |                       |
| Ln(1)-N(1)               | 2.728(2)              | 2.670(2)              | 2.643(2)              | 2.522(3)               | 2.475(4)               | 2.594(2)              | 2.546(2)              |
| Ln(1)-N(2)               | 2.816(2)              | 2.693(2)              | 6.670(2)              | 2.553(3)               | 2.509(3)               |                       |                       |
| Ln(1)-N(2)'              |                       |                       |                       |                        |                        | 2.542(2)              | 2.492(2)              |
| Ln(1)-N(3)               | 2.710(2)              | 2.683(2)              | 2.661(2)              | 2.571(4)               | 2.526(4)               | 2.570(3)              | 2.520(2)              |
| Ln(1)-N(4)               | 2.742(2)              | 2.653(2)              | 2.630(2)              | 2.524(3)               | 2.473(3)               |                       |                       |
| (C-C) range              | 1.510(3)-<br>1.537(5) | 1.508(3)-<br>1.533(3) | 1.507(4)-<br>1.531(4) | 1.507(5)-<br>1.54(2)   | 1.509(5)-<br>1.548(8)  | 1.502(6)-<br>1.523(9) | 1.502(4)-<br>1.520(7) |
| (C=C, C=N, C=S)<br>range | 1.311(3)-<br>1.719(3) | 1.332(3)-<br>1.715(2) | 1.296(4)-<br>1.708(3) | 1.257(14)-<br>1.877(7) | 1.323(7)-<br>1.832(11) | 1.329(6)-<br>1.395(6) | 1.325(9)-<br>1.399(4) |
| Cl(1)-Ln(1)-Cl(2)        | 87.32(15)             | 92.25(2)              | 92.20(2)              | 89.70(3)               | 89.73(4)               | 171.43(3)             | 172.98(2)             |
| Cl(1)-Ln(1)-Cl(3)        | 110.76(2)             | 170.13(2)             | 170.57(2)             | 174.32(4)              | 174.85(4)              | 91.13(4)              | 90.60(3)              |
| Cl(2)-Ln(1)-Cl(3)        | 140.45(2)             | 93.94(2)              | 93.65(2)              | 95.53(4)               | 95.05(4)               | 97.10(4)              | 96.42(2)              |
| N(1)-Ln(1)-Cl(2)         | 74.43(4)              | 79.24(4)              | 79.08(6)              | 76.42(8)               | 76.09(9)               |                       |                       |
| N(1)-Ln(1)-Cl(1)         | 75.70(4)              | 84.29(5)              | 84.47(7)              | 89.80(10)              | 89.73(11)              |                       |                       |
| N(1)-Ln(1)-N(4)          | 123.08(5)             | 155.40(6)             | 155.18(8)             | 152.28(12)             | 151.40(13)             | 70.05(10)             | 70.03(8)              |
| N(1)-Ln(1)-N(2)          | 79.42(5)              | 67.41(5)              | 67.43(7)              | 67.94(10)              | 68.24(12)              |                       |                       |
| N(2)-Ln(1)-N(3)          | 67.55(5)              | 70.67(5)              | 70.76(7)              | 72.24(10)              | 72.06(11)              |                       |                       |
| N(3)-Ln(1)-N(4)          | 75.06(5)              | 68.62(5)              | 68.77(7)              | 67.92(12)              | 68.59(12)              |                       |                       |
| N(1)-Ln(1)-N(3)          | 144.35(5)             | 133.48(5)             | 133.63(7)             | 139.74(10)             | 139.93(12)             | 67.59(10)             | 68.10(8)              |
| Cl(3)-Ln(1)-N(1)         | 76.40(4)              | 104.42(5)             | 103.90(7)             | 93.59(10)              | 93.28(11)              |                       |                       |
| Cl(2)-Ln(1)-N(2)         | 74.39(4)              | 143.82(4)             | 143.70(5)             | 144.36(7)              | 144.33(8)              |                       |                       |
| Cl(1)-Ln(1)-N(2)         | 152.08(4)             | 97.82(4)              | 97.91(6)              | 90.17(7)               | 90.03(9)               |                       |                       |
| Cl(3)-Ln(1)-N(2)         | 74.24(4)              | 81.63(4)              | 81.64(6)              | 86.88(8)               | 87.21(9)               |                       |                       |
| N(4)-Ln(1)-Cl(3)         | 72.51(4)              | 84.35(4)              | 84.64(5)              | 87.01(10)              | 87.82(11)              |                       |                       |
| N(2)'-Ln(1)-N(4)         |                       |                       |                       |                        |                        | 71.13(10)             | 71.09(7)              |
| Cl(3)-Ln(1)-N(3)         |                       |                       |                       |                        |                        | 75.25(8)              | 75.05(6)              |
| Cl(3)-Ln(1)-N(2)'        |                       |                       |                       |                        |                        | 76.36(8)              | 76.12(6)              |
| N(2)'-Ln(1)-N(1)         |                       |                       |                       |                        |                        | 140.73(10)            | 140.66(8)             |

Symmetry operation :  $^1+x, +y, -1+z$

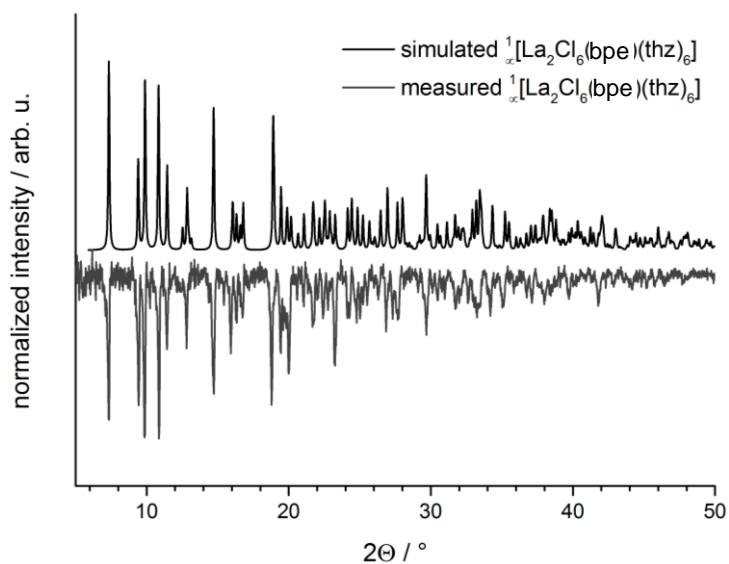

Figure S5. Comparison of the simulated diffraction pattern (top) of the single-crystal X-ray structure determination of  $[\text{La}_2\text{Cl}_6(\text{bpe})(\text{thz})_6](\mathbf{1})$  at 100 K with the observed powder X-ray diffraction patterns (Cu-radiation) at RT (bottom).

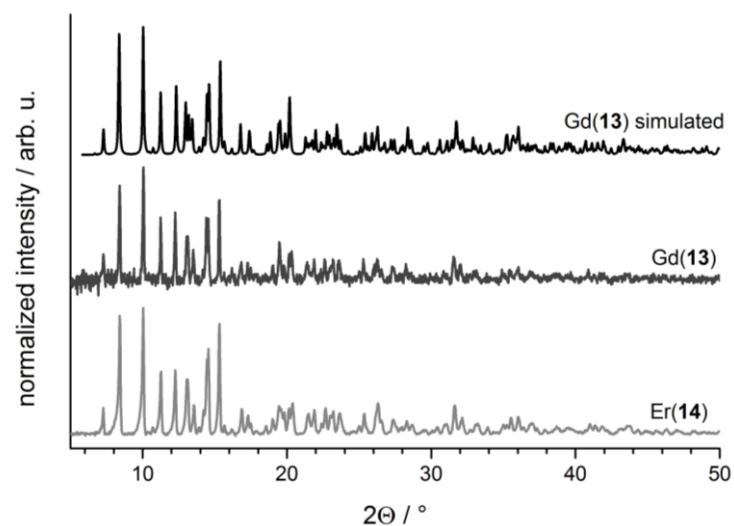

Figure S6. Comparison of the observed powder X-ray diffraction patterns (Cu-radiation) of isotopic  $[\text{LnCl}_3(\text{bpe})(\text{py})_2] \cdot (\text{bpe}/\text{py})$  with Ln = Gd(**13**), Er(**14**) with the simulated diffraction pattern of the single-crystal X-ray structure determination of **13**(Gd) at 168K.

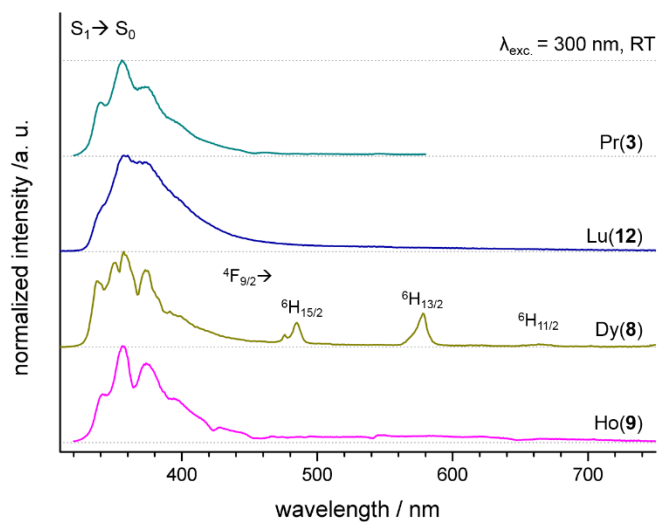

Figure S7. Solid state emission spectra of the compounds  $[\text{LnCl}_3(\text{bpe})_2] \cdot \text{thz}$  (**3**, **8**, **9** and **12**) at RT.

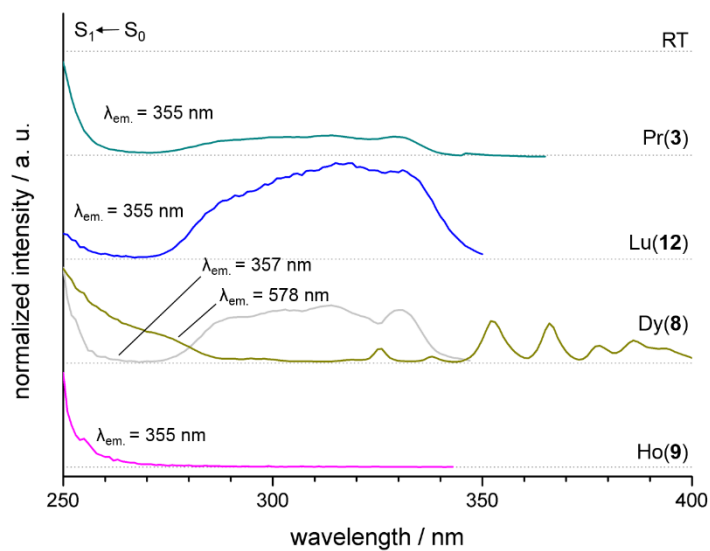

Figure S8. Solid state excitation spectra of the compounds  ${}^3_{\text{Ln}}[\text{LnCl}_3(\text{bpe})_2]\cdot\text{thz}$  (**3**, **8**, **9** and **12**) at RT.

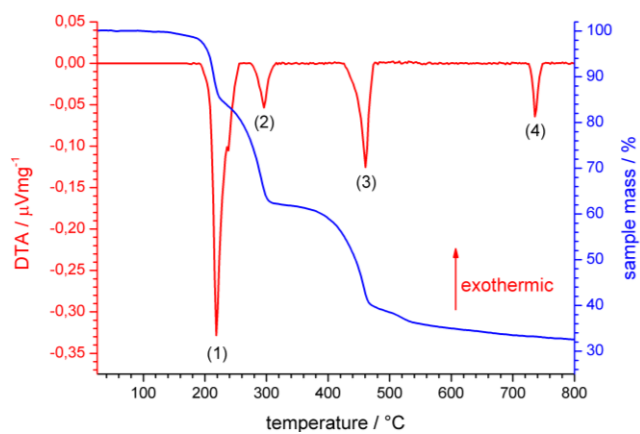

Figure S9. DTA/TG investigation of  ${}^3_{\text{Nd}}[\text{NdCl}_3(\text{bpe})_2]\cdot\text{thz}$  (**4**) performed with a heating rate of  $10^\circ\text{C}/\text{min}$  and a flow rate of  $20\text{ ml min}^{-1}$  Ar and  $20\text{ ml N}_2\text{ min}^{-1}$ .

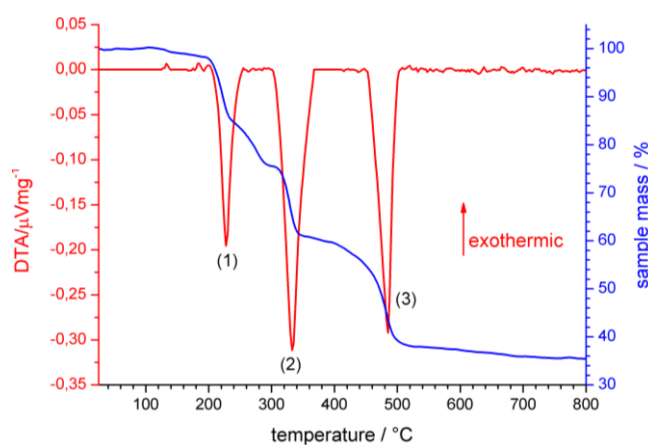

Figure S10. DTA/TG investigation of  ${}^3_{\text{Gd}}[\text{GdCl}_3(\text{bpe})_2]\cdot\text{thz}$  (**6**) performed with a heating rate of  $10^\circ\text{C}/\text{min}$  and a flow rate of  $20\text{ ml min}^{-1}$  Ar and  $20\text{ ml N}_2\text{ min}^{-1}$ .

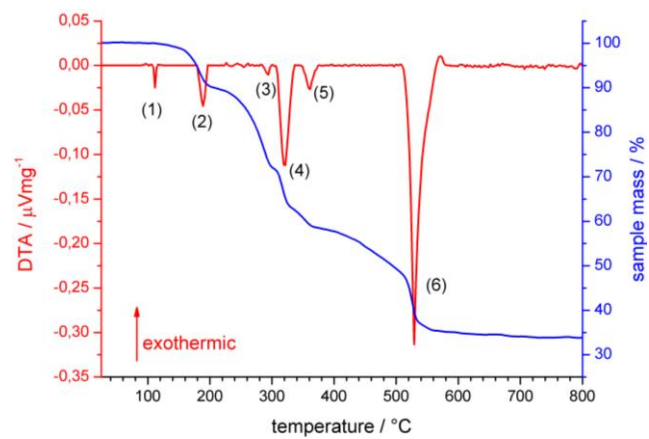

Figure S11. DTA/TG investigation of  ${}^3\text{[YbCl}_3(\text{bpe})_2\text{]}\cdot\text{thz}$  (**11**) performed with a heating rate of  $10^\circ\text{C}/\text{min}$  and a flow rate of  $20\text{ ml min}^{-1}$  Ar and  $20\text{ ml N}_2\text{ min}^{-1}$ .
